# Supplementary material
Source: publisher site journal article supplement (https://www.dovepress.com/article/279024)
Supplement: Supplementary file 1 [file get_supplementary_file.php]

**Supplementary Table S1** Enrichment pathways from the analysis of gene set enrichment

| Gene set names | -log(p-value) | Counts of enriched genes |
| --- | --- | --- |
| PI3K/AKT Signaling | 4.54 | 15 |
| Signaling by Rho Family GTPases | 3.99 | 21 |
| NRF2-mediated Oxidative Stress Response | 3.95 | 18 |
| Molecular Mechanisms of Cancer | 3.88 | 28 |
| Regulation of Actin-based Motility by Rho | 3.74 | 11 |
| RhoA Signaling | 3.63 | 13 |
| ILK Signaling | 3.52 | 17 |
| FAK Signaling | 3.15 | 11 |
| PAK Signaling | 3.08 | 11 |
| PTEN Signaling | 3.05 | 12 |
